# Supplementary material for: Unveiling the zwitterionic nature of an ethyl piperazine-based dithiocarbamate chain transfer agent for achieving high molar mass polyvinyl acetate: experimental and computational insights
Source: Royal Society of Chemistry journal article supplement (doi:10.1039/d4py01177e), 2024-12-06
Supplement: d4py01177e1.pdf [file d4py01177e1.pdf]

## Supporting information

### **Unveiling the Zwitterionic Nature of Ethyl Piperazine-based Dithiocarbamate Chain Transferring Agent for Achieving High Molar Mass of Poly Vinyl Acetate: Experimental and Computational Insight**

*P.M. Haribabu,<sup>a</sup> Prabodh Ranjan,<sup>b</sup> and Kari Vijayakrishna<sup>a\*</sup>*

*<sup>a</sup> Department of Chemistry, School of Basic Sciences, Indian Institute of Technology Bhubaneswar -752050, Odisha, India.*

*<sup>b</sup> Department of Chemistry and Center for Environmental Sciences and Engineering Indian Institute of Technology Kanpur, Kanpur, 208016.*

*Corresponding Author: Kari Vijayakrishna (E-mail: [kvijayakrishna@iitbbs.ac.in](mailto:kvijayakrishna@iitbbs.ac.in) & [vijayakrishnakari@gmail.com](mailto:vijayakrishnakari@gmail.com))*

**Table S1.** Results for the homo-polymerization of VAC by using CTA-1 at a fixed concentration (500:1:0.1).

| Entry | M: CTA: I | Time(min) | Conversions (%) | M <sub>n,THEO</sub> (Da) | M <sub>n,SEC</sub> (Da) | <i>D</i> |
|-------|-----------|-----------|-----------------|--------------------------|-------------------------|----------|
| 1     | 500:1:0.1 | 15        | 23              | 10170                    | 5340                    | 1.21     |
| 2     | 500:1:0.1 | 30        | 42              | 18340                    | 7590                    | 1.17     |
| 3     | 500:1:0.1 | 45        | 63              | 27380                    | 9890                    | 1.15     |
| 4     | 500:1:0.1 | 60        | 80              | 34400                    | 13240                   | 1.11     |
| 5     | 500:1:0.1 | 90        | 95              | 40870                    | 16400                   | 1.12     |

**Table S2.** Kinetic study for the homo-polymerization of VAc by using CTA-1, -2 and without CTA at a fixed concentration (500:1:0.1).

| Entry | M: CTA: I | Time(min) | CTA-1 (%) <sup>*</sup> | CTA-2 (%) <sup>*</sup> | Without CTA <sup>*</sup> (%) |
|-------|-----------|-----------|------------------------|------------------------|------------------------------|
| 1     | 500:1:0.1 | 15        | 23                     | 19                     | 65                           |
| 2     | 500:1:0.1 | 30        | 42                     | 36                     | 90                           |
| 3     | 500:1:0.1 | 45        | 63                     | 41                     | 93                           |
| 4     | 500:1:0.1 | 60        | 80                     | 45                     | 95                           |
| 5     | 500:1:0.1 | 90        | 95                     | 46                     | 95                           |

<sup>\*</sup> Reaction period 90 minutes; Conversions were calculated using <sup>1</sup>H NMR.

**Table S3.** Xanthate and dithiocarbamate RAFT agents used for the synthesis of high molar mass VAc polymers

| Sr. No. | RAFT agent                                                                          | Molar mass (Da) | $\bar{D}$ | Time   | Ref          |
|---------|-------------------------------------------------------------------------------------|-----------------|-----------|--------|--------------|
| 1       | 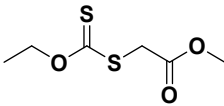   | 80200           | 2.6       | 6 h    | 32           |
| 2       |    | 50000           | 2.0       | 4.25 h | 23           |
| 3       |    | 6700            | 1.40      | 4.5 h  | 35           |
| 4       |   | 27690           | 1.46      | 16 h   | 36           |
| 5       |  | 129210          | 1.54      | 1 h    | 31           |
| ##6     |  | 66360           | 1.40      | 1.5 h  | ##           |
| 7       |  | 132970          | 1.31      | 1.5 h  | Present work |

## VAc was polymerized using morpholine based CTA (used in ref.31) with a MON:CTA:Initiator ratio of 4000:1:0.5 same as that of the present work reported in entry 7, to have a clear cut comparison.

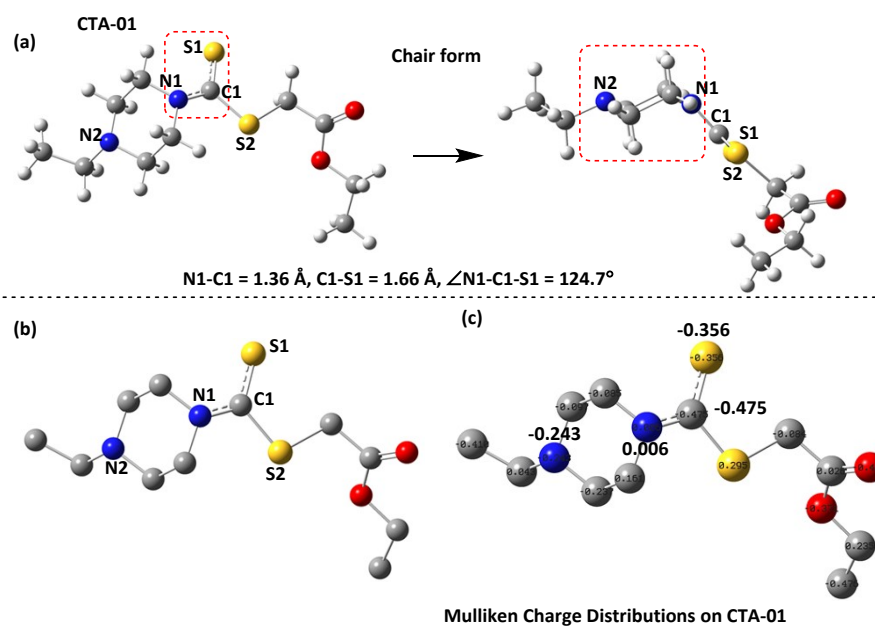

**Figure S1.** Optimized geometry of compound 1 (chair form) at MP2/g-31++(d,p) level of theory: (a) Front view and side view of chair form of CTA-01, (b) Front view of CTA-01 without hydrogen atoms and (c) Mulliken charges on all atoms of CTA-01.

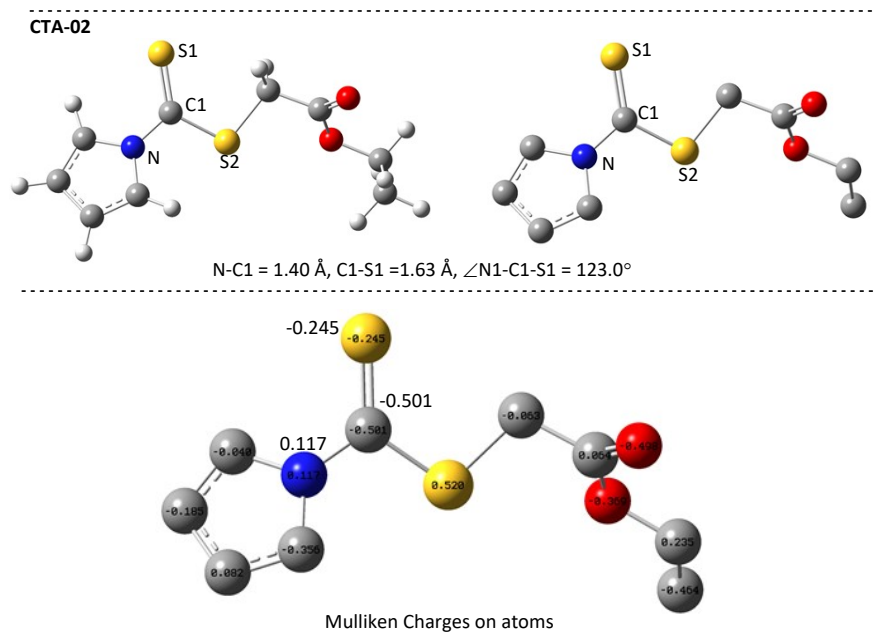

**Figure S2.** Optimized geometry of CTA-02 at MP2/g-31++(d,p) level of theory: (a) Front view of with hydrogen, (b) Front without hydrogen atoms and (c) Mulliken charges on all atoms of CTA-02.

(a)

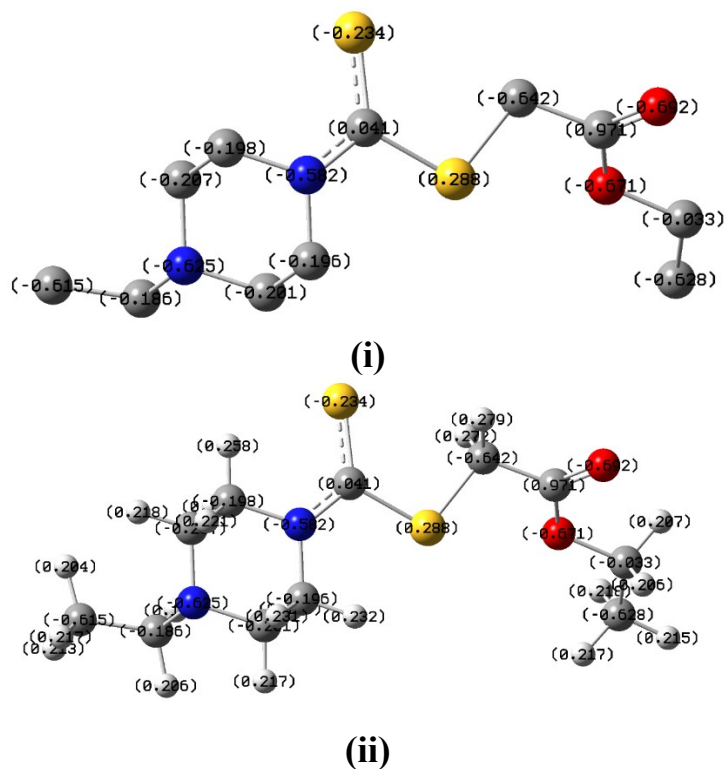

(b)

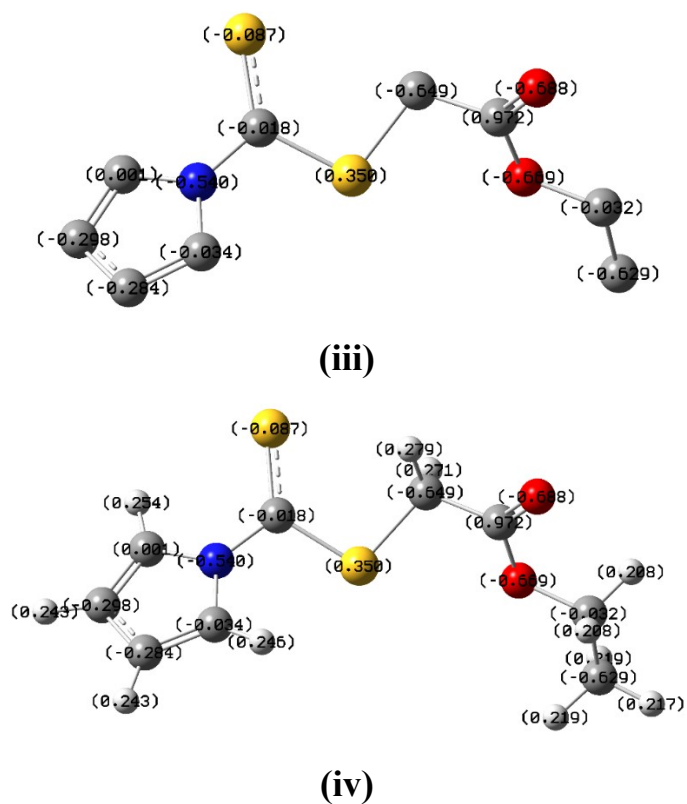

**Figure S3.** (a) CTA-01 NPA charges (i) without hydrogen (H-atoms are hide) and (ii) with hydrogen. (b) CTA-02 NPA charges (iii) without hydrogen (H-atoms are hide) and (iv) with hydrogen.

**Table S4.** Stable form CTAs and energies of the CTAs

| <b>CTA</b> | <b>Stable form</b> | <b>Methods</b>    | <b>Energy (Kcal/mol)</b> |
|------------|--------------------|-------------------|--------------------------|
| CTA-01     | zwitterionic form  | b3lyp/6-31++(d,p) | -933321.2159596899       |
|            |                    | mp2/6-31++(d,p)   | -931310.1876005945       |
| CTA-02     | Neutral            | b3lyp/6-31++(d,p) | -847791.2616815767       |
|            |                    | mp2/6-31++(d,p)   | -846068.2388972407       |

### Optimized Geometries of CTA-01 and CTA-02 Energies and Their Coordinates

| <b>CTA-01</b>                                          |          | <b>Energy (Hartree)</b> |          |          |
|--------------------------------------------------------|----------|-------------------------|----------|----------|
| Electronic Energy (EE)                                 |          | -1484.404619            |          |          |
| Zero-point Energy Correction                           |          | 0.319093                |          |          |
| Thermal Free Energy Correction                         |          | 0.267691                |          |          |
| EE + Thermal Free Energy Correction                    |          | -1484.136929            |          |          |
| <b>Coordinates of the optimized geometry of CTA-01</b> |          |                         |          |          |
| <b>0</b>                                               | <b>1</b> | <b>X</b>                | <b>Y</b> | <b>Z</b> |
| C                                                      |          | -1.79796                | -0.19403 | 0.249934 |
| C                                                      |          | -1.05743                | -1.3934  | -0.32367 |
| N                                                      |          | 0.005224                | -0.91722 | -1.21032 |
| C                                                      |          | -0.55919                | -0.12805 | -2.30673 |
| C                                                      |          | -1.299                  | 1.069852 | -1.72642 |
| N                                                      |          | -2.36489                | 0.616022 | -0.83217 |
| H                                                      |          | -2.60541                | -0.5496  | 0.89015  |
| H                                                      |          | -0.61628                | -2.00063 | 0.461152 |
| H                                                      |          | 0.217702                | 0.181795 | -3.00138 |
| H                                                      |          | -0.57263                | 1.717715 | -1.20334 |
| H                                                      |          | -1.09887                | 0.394383 | 0.870841 |
| H                                                      |          | -1.74011                | -2.00167 | -0.92178 |
| H                                                      |          | -1.26123                | -0.76852 | -2.84621 |
| H                                                      |          | -1.75049                | 1.64866  | -2.5359  |
| C                                                      |          | -3.11123                | 1.768282 | -0.31569 |
| H                                                      |          | -2.46989                | 2.388656 | 0.334724 |
| H                                                      |          | -3.37933                | 2.379108 | -1.18052 |
| C                                                      |          | -4.37894                | 1.369736 | 0.425742 |
| H                                                      |          | -4.16624                | 0.879557 | 1.374369 |
| H                                                      |          | -4.97068                | 2.259272 | 0.643843 |
| H                                                      |          | -4.97529                | 0.697105 | -0.19028 |
| C                                                      |          | 1.286702                | -0.8009  | -0.76059 |
| S                                                      |          | 1.845355                | -1.42902 | 0.668253 |
| C                                                      |          | 3.953512                | -0.11311 | -1.09311 |
| H                                                      |          | 3.96424                 | 0.400389 | -0.13211 |
| H                                                      |          | 4.161203                | -1.16955 | -0.95206 |

|   |          |          |          |
|---|----------|----------|----------|
| S | 2.338819 | 0.109788 | -1.88453 |
| C | 5.011951 | 0.466278 | -2.00369 |
| O | 5.947935 | -0.16494 | -2.47209 |
| O | 4.801836 | 1.787304 | -2.21372 |
| C | 5.777818 | 2.4388   | -3.07171 |
| H | 6.763763 | 2.319467 | -2.62308 |
| H | 5.776457 | 1.934811 | -4.03794 |
| C | 5.363774 | 3.886966 | -3.17556 |
| H | 5.356316 | 4.354782 | -2.19267 |
| H | 6.069418 | 4.423179 | -3.81045 |
| H | 4.370159 | 3.971462 | -3.61219 |

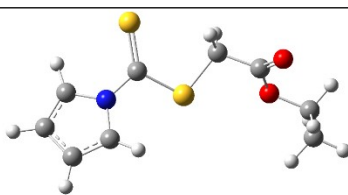

| <b>CTA-02</b>                                          |          | <b>Energy (Hartree)</b> |          |          |
|--------------------------------------------------------|----------|-------------------------|----------|----------|
| Electronic Energy (EE)                                 |          | -1348.442668            |          |          |
| Zero-point Energy Correction                           |          | 0.192928                |          |          |
| Thermal Free Energy Correction                         |          | 0.147395                |          |          |
| EE + Thermal Free Energy Correction                    |          | -1348.295273            |          |          |
| <b>Coordinates of the optimized geometry of CTA-02</b> |          |                         |          |          |
| <b>0</b>                                               | <b>1</b> | <b>X</b>                | <b>Y</b> | <b>Z</b> |
|                                                        | C        | 1.424189                | -0.61297 | -0.90817 |
|                                                        | S        | 1.91017                 | -2.05379 | -0.30787 |
|                                                        | C        | 3.971638                | -0.38056 | -1.90697 |
|                                                        | H        | 4.469989                | -0.52365 | -0.94772 |
|                                                        | H        | 3.72915                 | -1.34658 | -2.34243 |
|                                                        | S        | 2.458899                | 0.590136 | -1.66991 |
|                                                        | C        | 4.882445                | 0.361981 | -2.85791 |
|                                                        | O        | 5.357751                | -0.11541 | -3.87689 |
|                                                        | O        | 5.11825                 | 1.617578 | -2.41464 |
|                                                        | C        | 5.990596                | 2.420566 | -3.25951 |
|                                                        | H        | 6.950348                | 1.9111   | -3.34029 |
|                                                        | H        | 5.545398                | 2.478008 | -4.25231 |
|                                                        | C        | 6.107575                | 3.772565 | -2.59872 |
|                                                        | H        | 6.536497                | 3.67709  | -1.60287 |
|                                                        | H        | 6.755702                | 4.413915 | -3.19615 |
|                                                        | H        | 5.130784                | 4.2459   | -2.51703 |
|                                                        | N        | 0.101822                | -0.14678 | -0.81648 |
|                                                        | C        | -0.79883                | -0.52911 | 0.172998 |
|                                                        | C        | -0.51695                | 0.775424 | -1.66152 |
|                                                        | C        | -1.9757                 | 0.149154 | -0.04543 |
|                                                        | H        | -0.50209                | -1.22738 | 0.935565 |
|                                                        | C        | -1.80097                | 0.966581 | -1.20351 |
|                                                        | H        | -0.0129                 | 1.155272 | -2.53306 |
|                                                        | H        | -2.85904                | 0.076343 | 0.56839  |
|                                                        | H        | -2.53753                | 1.604487 | -1.66521 |



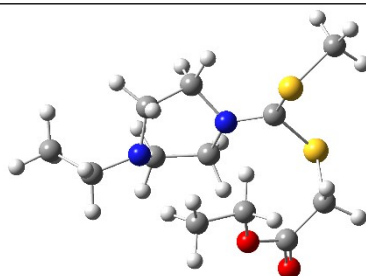

| <b>CTA-01a</b>                                          |          | <b>Energy (Hartree)</b> |          |          |
|---------------------------------------------------------|----------|-------------------------|----------|----------|
| Electronic Energy (EE)                                  |          | -1524.102686            |          |          |
| Zero-point Energy Correction                            |          | 0.356722                |          |          |
| Thermal Free Energy Correction                          |          | 0.304614                |          |          |
| EE + Thermal Free Energy Correction                     |          | -1523.798071            |          |          |
| <b>Coordinates of the optimized geometry of CTA-01a</b> |          |                         |          |          |
| <b>0</b>                                                | <b>2</b> | <b>X</b>                | <b>Y</b> | <b>Z</b> |
| C                                                       |          | 5.456916                | 1.136317 | -1.38941 |
| S                                                       |          | 6.218908                | -0.04852 | -2.46629 |
| S                                                       |          | 6.192465                | 2.712762 | -1.21778 |
| C                                                       |          | 7.71422                 | -0.40635 | -1.50808 |
| H                                                       |          | 8.336771                | -1.05747 | -2.12046 |
| H                                                       |          | 8.25303                 | 0.516078 | -1.30247 |
| H                                                       |          | 7.464728                | -0.90962 | -0.57643 |
| C                                                       |          | 6.039486                | 3.469838 | -2.89621 |
| H                                                       |          | 6.286741                | 2.71157  | -3.63659 |
| H                                                       |          | 6.790855                | 4.258633 | -2.91841 |
| C                                                       |          | 4.695849                | 4.137089 | -3.09227 |
| O                                                       |          | 4.453331                | 5.243609 | -2.63306 |
| O                                                       |          | 3.703154                | 3.469315 | -3.74136 |
| C                                                       |          | 3.954155                | 2.202442 | -4.40403 |
| H                                                       |          | 4.305926                | 1.475031 | -3.67584 |
| H                                                       |          | 4.711017                | 2.347951 | -5.17805 |
| C                                                       |          | 2.634609                | 1.767152 | -4.99612 |
| H                                                       |          | 2.771037                | 0.828253 | -5.53548 |
| H                                                       |          | 1.914679                | 1.61647  | -4.19352 |
| H                                                       |          | 2.260001                | 2.518428 | -5.69024 |
| C                                                       |          | 3.289291                | 2.07815  | -0.627   |
| H                                                       |          | 3.647368                | 2.344605 | 0.37532  |
| C                                                       |          | 2.203372                | -0.47853 | -1.65589 |
| H                                                       |          | 1.596815                | -1.23379 | -1.13212 |
| N                                                       |          | 4.094359                | 0.987266 | -1.19372 |
| N                                                       |          | 1.542102                | 0.824333 | -1.74937 |
| C                                                       |          | 1.821182                | 1.639513 | -0.57645 |
| C                                                       |          | 3.524787                | -0.32629 | -0.9007  |

|   |          |          |          |
|---|----------|----------|----------|
| H | 1.597318 | 1.123265 | 0.371037 |
| H | 3.36848  | -0.40755 | 0.182849 |
| H | 2.38811  | -0.8415  | -2.67193 |
| H | 3.379751 | 2.950252 | -1.26903 |
| H | 1.193144 | 2.532177 | -0.61123 |
| H | 4.229151 | -1.09883 | -1.19577 |
| C | 0.126669 | 0.739144 | -2.10862 |
| H | -0.19175 | 1.744039 | -2.40122 |
| H | 0.065933 | 0.111478 | -3.00268 |
| C | -0.82032 | 0.199952 | -1.03335 |
| H | -0.82831 | 0.845043 | -0.15466 |
| H | -1.83718 | 0.159927 | -1.42648 |
| H | -0.54654 | -0.80679 | -0.71766 |

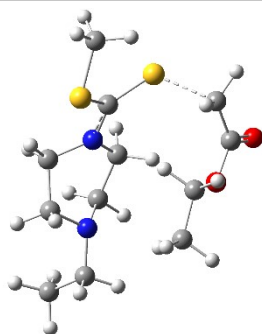

| <b>*CTA-01b (TS)</b>                                     |          | <b>Energy (Hartree)</b>  |          |          |
|----------------------------------------------------------|----------|--------------------------|----------|----------|
| Electronic Energy (EE)                                   |          | -1524.078734             |          |          |
| Zero-point Energy Correction                             |          | 0.354192                 |          |          |
| Thermal Free Energy Correction                           |          | 0.302888                 |          |          |
| EE + Thermal Free Energy Correction                      |          | -1523.775846             |          |          |
| Imaginary Frequency                                      |          | -625.84 cm <sup>-1</sup> |          |          |
| <b>Coordinates of the optimized geometry of *CTA-01b</b> |          |                          |          |          |
| <b>0</b>                                                 | <b>2</b> | <b>X</b>                 | <b>Y</b> | <b>Z</b> |
| C                                                        |          | 5.361206                 | 0.936463 | -1.2096  |
| S                                                        |          | 6.119224                 | -0.51052 | -1.96176 |
| S                                                        |          | 6.179026                 | 2.416471 | -1.07648 |
| C                                                        |          | 7.900091                 | -0.20376 | -1.72515 |
| H                                                        |          | 8.39382                  | -1.1024  | -2.1036  |
| H                                                        |          | 8.229555                 | 0.668483 | -2.28905 |
| H                                                        |          | 8.131183                 | -0.0714  | -0.66703 |
| C                                                        |          | 6.173177                 | 3.549214 | -3.00908 |
| H                                                        |          | 6.479497                 | 2.791817 | -3.72213 |
| H                                                        |          | 6.956041                 | 4.247033 | -2.72946 |
| C                                                        |          | 4.86375                  | 4.197479 | -3.15597 |
| O                                                        |          | 4.588485                 | 5.27193  | -2.64555 |
| O                                                        |          | 3.862182                 | 3.536262 | -3.81946 |
| C                                                        |          | 4.11947                  | 2.354442 | -4.60323 |
| H                                                        |          | 4.569769                 | 1.574912 | -3.97925 |
| H                                                        |          | 4.818621                 | 2.601902 | -5.41261 |
| C                                                        |          | 2.787394                 | 1.884915 | -5.16142 |
| H                                                        |          | 2.938765                 | 0.997879 | -5.78646 |
| H                                                        |          | 2.106272                 | 1.627635 | -4.34484 |
| H                                                        |          | 2.326255                 | 2.66651  | -5.77242 |
| C                                                        |          | 3.223443                 | 1.979252 | -0.53403 |
| H                                                        |          | 3.558486                 | 2.37119  | 0.435871 |
| C                                                        |          | 2.062842                 | -0.59025 | -1.47932 |
| H                                                        |          | 1.430528                 | -1.34191 | -0.97275 |
| N                                                        |          | 4.032686                 | 0.804255 | -0.91533 |
| N                                                        |          | 1.417758                 | 0.718245 | -1.59757 |
| C                                                        |          | 1.732719                 | 1.603852 | -0.48418 |

|   |          |          |          |
|---|----------|----------|----------|
| C | 3.362524 | -0.47516 | -0.6664  |
| H | 1.466928 | 1.178843 | 0.501956 |
| H | 3.138925 | -0.53376 | 0.408331 |
| H | 2.273498 | -0.96929 | -2.48801 |
| H | 3.378185 | 2.757964 | -1.28125 |
| H | 1.154016 | 2.52645  | -0.59197 |
| H | 4.031477 | -1.30189 | -0.89724 |
| C | 0.015658 | 0.677098 | -2.01099 |
| H | -0.26548 | 1.692613 | -2.31662 |
| H | -0.03663 | 0.055361 | -2.91413 |
| C | -1.00125 | 0.161364 | -0.97615 |
| H | -1.02486 | 0.795611 | -0.08351 |
| H | -2.00709 | 0.164428 | -1.41029 |
| H | -0.78377 | -0.86367 | -0.65758 |

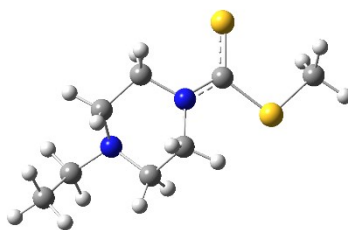

| <b>CTA-01c</b>                                          |          | <b>Energy (Hartree)</b> |          |          |
|---------------------------------------------------------|----------|-------------------------|----------|----------|
| Electronic Energy (EE)                                  |          | -1217.932395            |          |          |
| Zero-point Energy Correction                            |          | 0.245722                |          |          |
| Thermal Free Energy Correction                          |          | 0.203999                |          |          |
| EE + Thermal Free Energy Correction                     |          | -1217.728396            |          |          |
| <b>Coordinates of the optimized geometry of CTA-01c</b> |          |                         |          |          |
| <b>0</b>                                                | <b>1</b> | <b>X</b>                | <b>Y</b> | <b>Z</b> |
| C                                                       |          | 5.373474                | 0.883776 | -1.03882 |
| S                                                       |          | 6.129118                | -0.63923 | -1.58951 |
| S                                                       |          | 6.173935                | 2.335654 | -1.02373 |
| C                                                       |          | 7.803002                | -0.0978  | -1.97004 |
| H                                                       |          | 8.322392                | -0.99962 | -2.29276 |
| H                                                       |          | 7.802865                | 0.638849 | -2.76795 |
| H                                                       |          | 8.28717                 | 0.315307 | -1.08967 |
| C                                                       |          | 3.284895                | 1.92874  | -0.31846 |
| H                                                       |          | 3.535679                | 2.29063  | 0.684829 |
| C                                                       |          | 2.193283                | -0.53054 | -1.55566 |
| H                                                       |          | 1.458607                | -1.26963 | -1.20004 |
| N                                                       |          | 4.082703                | 0.742709 | -0.64688 |
| N                                                       |          | 1.636901                | 0.818273 | -1.67825 |
| C                                                       |          | 1.802106                | 1.586458 | -0.4527  |
| C                                                       |          | 3.350745                | -0.51523 | -0.55555 |
| H                                                       |          | 1.418777                | 1.076232 | 0.445551 |
| H                                                       |          | 2.972975                | -0.60586 | 0.467087 |
| H                                                       |          | 2.544549                | -0.85053 | -2.54021 |
| H                                                       |          | 3.543868                | 2.707344 | -1.03474 |
| H                                                       |          | 1.244076                | 2.52031  | -0.549   |
| H                                                       |          | 4.016021                | -1.35798 | -0.71998 |
| C                                                       |          | 0.289923                | 0.845768 | -2.24688 |
| H                                                       |          | 0.084623                | 1.878771 | -2.54063 |
| H                                                       |          | 0.324722                | 0.255439 | -3.16641 |
| C                                                       |          | -0.83803                | 0.339484 | -1.34433 |
| H                                                       |          | -0.93171                | 0.952922 | -0.44795 |
| H                                                       |          | -1.78761                | 0.384638 | -1.87951 |
| H                                                       |          | -0.67954                | -0.69423 | -1.03699 |

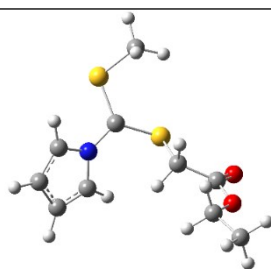

| <b>CTA-02a</b>                                          |          | <b>Energy (Hartree)</b> |          |          |
|---------------------------------------------------------|----------|-------------------------|----------|----------|
| Electronic Energy (EE)                                  |          | -1388.155557            |          |          |
| Zero-point Energy Correction                            |          | 0.233066                |          |          |
| Thermal Free Energy Correction                          |          | 0.184861                |          |          |
| EE + Thermal Free Energy Correction                     |          | -1387.970696            |          |          |
| <b>Coordinates of the optimized geometry of CTA-02a</b> |          |                         |          |          |
| <b>0</b>                                                | <b>2</b> | <b>X</b>                | <b>Y</b> | <b>Z</b> |
|                                                         | C        | 5.496189                | 0.879811 | -1.06683 |
|                                                         | S        | 6.658849                | -0.18941 | -0.29348 |
|                                                         | S        | 5.912722                | 2.541946 | -1.42223 |
|                                                         | C        | 8.082541                | -0.12492 | -1.44447 |
|                                                         | H        | 8.883326                | -0.69073 | -0.96266 |
|                                                         | H        | 7.829074                | -0.58948 | -2.3999  |
|                                                         | H        | 8.406547                | 0.906025 | -1.59434 |
|                                                         | C        | 5.22611                 | 2.668076 | -3.13132 |
|                                                         | H        | 4.169072                | 2.385524 | -3.11744 |
|                                                         | H        | 5.752635                | 1.966068 | -3.78626 |
|                                                         | C        | 5.39811                 | 4.088508 | -3.64666 |
|                                                         | O        | 5.985944                | 4.949903 | -3.035   |
|                                                         | O        | 4.872416                | 4.377573 | -4.86157 |
|                                                         | C        | 4.12498                 | 3.410846 | -5.63661 |
|                                                         | H        | 3.227251                | 3.114321 | -5.0823  |
|                                                         | H        | 4.74082                 | 2.521075 | -5.81065 |
|                                                         | C        | 3.755551                | 4.077354 | -6.94906 |
|                                                         | H        | 3.181292                | 3.380484 | -7.56828 |
|                                                         | H        | 3.146883                | 4.968362 | -6.77199 |
|                                                         | H        | 4.653006                | 4.374219 | -7.49887 |
|                                                         | C        | 3.660084                | -0.7928  | -1.23008 |
|                                                         | C        | 3.058548                | 1.330664 | -0.75333 |
|                                                         | C        | 2.288995                | -0.76387 | -1.13445 |
|                                                         | H        | 4.343457                | -1.59929 | -1.44272 |
|                                                         | C        | 1.907667                | 0.580329 | -0.83184 |
|                                                         | H        | 3.217834                | 2.369993 | -0.51228 |
|                                                         | H        | 1.631293                | -1.61193 | -1.26483 |
|                                                         | H        | 0.90451                 | 0.951017 | -0.67304 |
|                                                         | N        | 4.143469                | 0.49326  | -0.99722 |

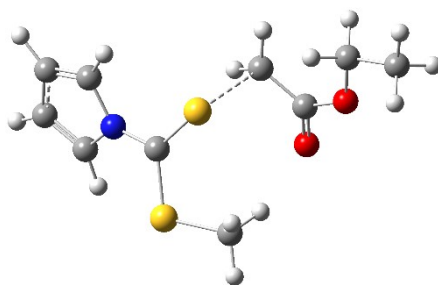

| <b>*CTA-02b (TS)</b>                                          |          | <b>Energy (Hartree)</b>  |          |          |
|---------------------------------------------------------------|----------|--------------------------|----------|----------|
| Electronic Energy (EE)                                        |          | -1388.120027             |          |          |
| Zero-point Energy Correction                                  |          | 0.234275                 |          |          |
| Thermal Free Energy Correction                                |          | 0.188575                 |          |          |
| EE + Thermal Free Energy Correction                           |          | -1387.931452             |          |          |
| Imaginary Frequency                                           |          | -389.11 cm <sup>-1</sup> |          |          |
| <b>Coordinates of the optimized geometry of *CTA-02b (TS)</b> |          |                          |          |          |
| <b>0</b>                                                      | <b>2</b> | <b>X</b>                 | <b>Y</b> | <b>Z</b> |
| C                                                             |          | 4.5976                   | 0.734551 | -1.33645 |
| S                                                             |          | 6.195919                 | 0.499021 | -0.63487 |
| S                                                             |          | 4.054869                 | 2.158026 | -2.03267 |
| C                                                             |          | 7.124149                 | 1.969055 | -1.17515 |
| H                                                             |          | 8.114635                 | 1.844803 | -0.73035 |
| H                                                             |          | 7.202399                 | 1.989681 | -2.26355 |
| H                                                             |          | 6.657539                 | 2.879097 | -0.79749 |
| C                                                             |          | 4.345973                 | 1.872276 | -4.46239 |
| H                                                             |          | 3.445452                 | 2.40067  | -4.7489  |
| H                                                             |          | 4.296225                 | 0.791021 | -4.45776 |
| C                                                             |          | 5.675735                 | 2.429439 | -4.68048 |
| O                                                             |          | 6.695409                 | 1.757538 | -4.57917 |
| O                                                             |          | 5.816752                 | 3.758164 | -4.95891 |
| C                                                             |          | 4.67705                  | 4.626761 | -5.10712 |
| H                                                             |          | 4.075652                 | 4.608832 | -4.19033 |
| H                                                             |          | 4.055685                 | 4.279063 | -5.94208 |
| C                                                             |          | 5.204226                 | 6.025083 | -5.37709 |
| H                                                             |          | 4.367286                 | 6.720105 | -5.50285 |
| H                                                             |          | 5.82284                  | 6.372339 | -4.54459 |
| H                                                             |          | 5.810084                 | 6.040592 | -6.28757 |
| C                                                             |          | 4.215691                 | -1.72317 | -1.04622 |
| C                                                             |          | 2.395958                 | -0.40906 | -1.37279 |
| C                                                             |          | 3.110602                 | -2.52867 | -1.01824 |
| H                                                             |          | 5.263842                 | -1.96319 | -0.97531 |
| C                                                             |          | 1.958253                 | -1.69508 | -1.21939 |
| H                                                             |          | 1.865111                 | 0.515366 | -1.52661 |
| H                                                             |          | 3.119767                 | -3.60134 | -0.88467 |
| H                                                             |          | 0.925676                 | -2.01381 | -1.24492 |
| N                                                             |          | 3.792034                 | -0.40524 | -1.26609 |

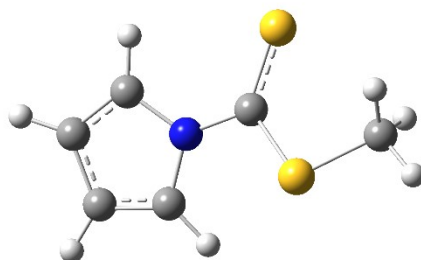

| <b>CTA-02c</b>                                          |          | <b>Energy (Hartree)</b> |          |          |
|---------------------------------------------------------|----------|-------------------------|----------|----------|
| Electronic Energy (EE)                                  |          | -1081.982372            |          |          |
| Zero-point Energy Correction                            |          | 0.119940                |          |          |
| Thermal Free Energy Correction                          |          | 0.084639                |          |          |
| EE + Thermal Free Energy Correction                     |          | -1081.897733            |          |          |
| <b>Coordinates of the optimized geometry of CTA-02c</b> |          |                         |          |          |
| <b>0</b>                                                | <b>1</b> | <b>X</b>                | <b>Y</b> | <b>Z</b> |
|                                                         | C        | 5.666898                | 0.920033 | -1.05121 |
|                                                         | S        | 6.543742                | -0.60112 | -1.00198 |
|                                                         | S        | 6.306892                | 2.402356 | -0.79397 |
|                                                         | C        | 8.246588                | -0.02725 | -0.89997 |
|                                                         | H        | 8.858954                | -0.92692 | -0.93093 |
|                                                         | H        | 8.487817                | 0.614557 | -1.74404 |
|                                                         | H        | 8.419493                | 0.508627 | 0.029263 |
|                                                         | C        | 3.735932                | -0.36352 | -1.99444 |
|                                                         | C        | 3.282315                | 1.557033 | -0.87813 |
|                                                         | C        | 2.370505                | -0.1871  | -2.00107 |
|                                                         | H        | 4.35394                 | -1.11167 | -2.45917 |
|                                                         | C        | 2.085524                | 1.020287 | -1.29392 |
|                                                         | H        | 3.515337                | 2.442549 | -0.3137  |
|                                                         | H        | 1.660873                | -0.84218 | -2.48057 |
|                                                         | H        | 1.112588                | 1.440422 | -1.09569 |
|                                                         | N        | 4.299785                | 0.710947 | -1.3071  |



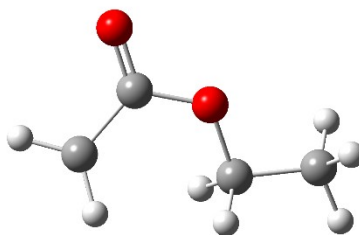

| <b>P1</b>                                          |          | <b>Energy (Hartree)</b> |          |          |
|----------------------------------------------------|----------|-------------------------|----------|----------|
| Electronic Energy (EE)                             |          | -306.147158             |          |          |
| Zero-point Energy Correction                       |          | 0.107541                |          |          |
| Thermal Free Energy Correction                     |          | 0.075760                |          |          |
| EE + Thermal Free Energy Correction                |          | -306.071398             |          |          |
| <b>Coordinates of the optimized geometry of P1</b> |          |                         |          |          |
| <b>0</b>                                           | <b>2</b> | <b>X</b>                | <b>Y</b> | <b>Z</b> |
|                                                    | C        | 6.037298                | 3.562235 | -3.12969 |
|                                                    | H        | 6.415991                | 2.917957 | -3.90529 |
|                                                    | H        | 6.696447                | 3.905548 | -2.35043 |
|                                                    | C        | 4.693261                | 4.185277 | -3.17605 |
|                                                    | O        | 4.449091                | 5.231409 | -2.62337 |
|                                                    | O        | 3.725395                | 3.548768 | -3.88283 |
|                                                    | C        | 3.959318                | 2.233958 | -4.44275 |
|                                                    | H        | 4.361883                | 1.575901 | -3.67121 |
|                                                    | H        | 4.678331                | 2.31193  | -5.26074 |
|                                                    | C        | 2.622934                | 1.737519 | -4.94314 |
|                                                    | H        | 2.742788                | 0.750462 | -5.39011 |
|                                                    | H        | 1.913202                | 1.66795  | -4.12148 |
|                                                    | H        | 2.224901                | 2.416868 | -5.69407 |

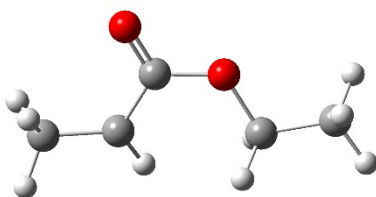

| <b>P2</b>                                          |          | <b>Energy (Hartree)</b> |          |          |
|----------------------------------------------------|----------|-------------------------|----------|----------|
| Electronic Energy (EE)                             |          | -345.338683             |          |          |
| Zero-point Energy Correction                       |          | 0.136772                |          |          |
| Thermal Free Energy Correction                     |          | 0.102251                |          |          |
| EE + Thermal Free Energy Correction                |          | -345.236431             |          |          |
| <b>Coordinates of the optimized geometry of P2</b> |          |                         |          |          |
| <b>0</b>                                           | <b>2</b> | <b>X</b>                | <b>Y</b> | <b>Z</b> |
|                                                    | C        | 3.371507                | 3.078052 | -4.38385 |
|                                                    | H        | 3.667287                | 2.215251 | -4.96055 |
|                                                    | C        | 3.955439                | 4.409958 | -4.65589 |
|                                                    | O        | 3.435718                | 5.435996 | -4.2722  |
|                                                    | O        | 5.110355                | 4.471289 | -5.37086 |
|                                                    | C        | 5.836975                | 3.270592 | -5.72128 |
|                                                    | H        | 5.25854                 | 2.692065 | -6.44464 |
|                                                    | H        | 5.998846                | 2.667717 | -4.82615 |
|                                                    | C        | 7.14855                 | 3.72409  | -6.31958 |
|                                                    | H        | 7.737356                | 2.855238 | -6.61463 |
|                                                    | H        | 6.969386                | 4.341394 | -7.19756 |
|                                                    | H        | 7.71533                 | 4.303396 | -5.59362 |
|                                                    | C        | 2.224743                | 2.98921  | -3.4467  |
|                                                    | H        | 2.121446                | 1.981051 | -3.04942 |
|                                                    | H        | 2.339298                | 3.702911 | -2.63318 |
|                                                    | H        | 1.291685                | 3.246494 | -3.95946 |

**Table S5.** Energies details of reactants, transition states and products calculated at MP2/6-31++(d,p) in Hartree.

|                                         | <b>CTA-01a</b>  | <b>*CTA-01b</b> | <b>CTA-01c</b> | <b>CTA-02a</b>         | <b>*CTA-02b</b> | <b>CTA-02c</b> | <b>P1</b>   |
|-----------------------------------------|-----------------|-----------------|----------------|------------------------|-----------------|----------------|-------------|
| <b>E<sub>0</sub></b>                    | -1524.102686    | -1524.078734    | -1217.932395   | -1388.155557           | -1388.120027    | -1081.982372   | -306.147158 |
| <b>E<sub>ZPE</sub></b>                  | 0.356722        | 0.354192        | 0.245722       | 0.233066               | 0.234275        | 0.119940       | 0.107541    |
| <b>E<sub>tot</sub></b>                  | 0.377966        | 0.374912        | 0.259305       | 0.249993               | 0.249991        | 0.129134       | 0.114753    |
| <b>H<sub>corr</sub></b>                 | 0.378911        | 0.375856        | 0.260249       | 0.250937               | 0.250935        | 0.130078       | 0.115697    |
| <b>G<sub>corr</sub></b>                 | 0.304614        | 0.302888        | 0.203999       | 0.184861               | 0.188575        | 0.084639       | 0.075760    |
| <b>E<sub>0</sub> + E<sub>ZPE</sub></b>  | -1523.745964    | -1523.724542    | -1217.686673   | -1387.922491           | -1387.885751    | -1081.862432   | -306.039617 |
| <b>E<sub>0</sub> + E<sub>tot</sub></b>  | -1523.724719    | -1523.703822    | -1217.673090   | -1387.905564           | -1387.870036    | -1081.853238   | -306.032406 |
| <b>E<sub>0</sub> + H<sub>corr</sub></b> | -1523.723775    | -1523.702878    | -1217.672145   | -1387.904620           | -1387.869092    | -1081.852294   | -306.031461 |
| <b>E<sub>0</sub> + G<sub>corr</sub></b> | -1523.798071    | -1523.775846    | -1217.728396   | -1387.970696           | -1387.931452    | -1081.897733   | -306.071398 |
| <b>*Energies barrier (in Kcal/mol)</b>  |                 |                 |                |                        |                 |                |             |
|                                         | <b>*CTA-01b</b> | <b>*CTA-02b</b> |                |                        |                 |                |             |
| <b>ΔG</b>                               | 13.946401       | 24.6259871      |                | *Transition state (TS) |                 |                |             |

**Table S6.** Energies details of reactants, transition states and products calculated at B3LYP/6-31++(d,p) in Hartree.

|                         | <b>CTA-01a</b> | <b>*CTA-01b</b> | <b>CTA-01c</b> | <b>CTA-02a</b> | <b>*CTA-02b</b> | <b>CTA-02c</b> | <b>P1</b>   |
|-------------------------|----------------|-----------------|----------------|----------------|-----------------|----------------|-------------|
| <b>E<sub>0</sub></b>    | -1527.4383     | -1527.43804     | -1220.387746   | -1391.043500   | -1391.039902    | -1083.983092   | -307.053454 |
| <b>E<sub>ZPE</sub></b>  | 0.348990       | 0.346447        | 0.240487       | 0.226844       | 0.224969        | 0.118714       | 0.103691    |
| <b>E<sub>tot</sub></b>  | 0.373216       | 0.373959        | 0.255596       | 0.245137       | 0.246525        | 0.129563       | 0.111310    |
| <b>H<sub>corr</sub></b> | 0.374303       | 0.375046        | 0.256682       | 0.246224       | 0.247612        | 0.130650       | 0.112397    |
| <b>G<sub>corr</sub></b> | 0.287211       | 0.280859        | 0.193127       | 0.173662       | 0.164680        | 0.076697       | 0.067694    |

|                                        |                 |                 |                               |              |              |              |             |
|----------------------------------------|-----------------|-----------------|-------------------------------|--------------|--------------|--------------|-------------|
| $E_0 + E_{ZPE}$                        | -1527.08936     | -1527.09160     | -1220.147260                  | -1390.816656 | -1390.814933 | -1083.864377 | -306.949762 |
| $E_0 + E_{tot}$                        | -1527.06513     | -1527.06408     | -1220.132151                  | -1390.798363 | -1390.793376 | -1083.853528 | -306.942144 |
| $E_0 + H_{corr}$                       | -1527.06405     | -1527.06300     | -1220.131064                  | -1390.797276 | -1390.792289 | -1083.852442 | -306.941057 |
| $E_0 + G_{corr}$                       | -1527.15114     | -1527.15719     | -1220.194619                  | -1390.869838 | -1390.875222 | -1083.906394 | -306.985760 |
| <b>*Energies barrier (in Kcal/mol)</b> |                 |                 |                               |              |              |              |             |
|                                        | <b>*CTA-01b</b> | <b>*CTA-02b</b> |                               |              |              |              |             |
| $\Delta G$                             | -3.796433       | -3.37851173     | <b>*Transition state (TS)</b> |              |              |              |             |
|                                        |                 |                 |                               |              |              |              |             |
